# Supplementary material for: Early prediction of childhood ADHD using prenatal and early postnatal behavioural features: evaluation across six machine-learning algorithms
Source: Research Square preprint supplement (doi:10.21203/rs.3.rs-7134745/v1), 2025-07-28
Supplement: Supplementary file 1 [file 7fadb7cf2125f13cb5310c26.docx]

**Supplemental materials**

**Table A1.** Domains and factors for predicting ADHD in children.

**Table A2.** Hyperparameters of six machine-learning.

**Table A3.** Tuned hyper-parameters for six machine-learning.

**Table A4.** Pairwise comparison of weighted test-set accuracy between XGBoost and alternative models.

**Table A5.** Permutation sensitivity analysis of prenatal and postnatal feature groups using 10-fold cross-validation.

**Table A6.** Analysis of the linear correlation distribution between the prenatal and postnatal groups across all features.

**Table A7.** Univariate logistic regression analysis of the effect of maternal ac on the occurrence of childhood ADHD.

**Fig. A1** Feature importance of four machine learning algorithm.

**Fig. A2** Global SHAP summary plot illustrating feature importance in the XGBoost model (Exclude sampling weights).

**References**

**Table A1.** Domains and factors for predicting ADHD in children

| **Domain** | **Variables/Features** | **Variables derived and processed in the dataset** | **Description** | **Value** | **Datasets of variable sources** |
| --- | --- | --- | --- | --- | --- |
| Demographic | Gender | AHCSEX00 BHCSEX00 | Cohort Member Sex | 1=Male, 2=Female | mcs1_hhgrid.sav mcs2_hhgrid.sav |
|  | Race | ADC06E00 BDC06E00 | Cohort Member Ethnic Group - 6 category Census class | 1=White 2=Mixed 3=Indian 4=Pakistani and Bangladeshi 5=Black or Black British 6=Other Ethnic group (inc. Chinese, Other | mcs1_cm_derived.sav mcs2_cm_derived.sav |
|  | Household income quintiles | AOECDUK0 BOECDUK0 | OECD Income Weighted Quintiles (UK Analysis) | 1=Lowest quintile 2=Second quintile 3=Third quintile 4=Fourth quintile 5=Highest quintile | mcs1_family_derived.sav mcs2_family_derived.sav |
|  | Mothers academic qualification | APACQU00 BPACQU00 | Mother's Highest Academic qualification | 1=Higher degree 2=First degree 3=Diplomas in higher education 4=A/AS/Slevels 5=O level/GCSE grades A-C 6=GCSE gradesD-G 7=Other academic qualifications 8=None of these qualifications | mcs1_parent_interview mcs2_parent_interview |
| Prenatal Factors | Premature | DERLT00 | One of the perinatal complications: whether preterm (<37 weeks) | 1=Premature 0=Not Premature | mcs1_cm_derived |
|  | Low weight | ADBWGT00 BDBWGT00 | One of the perinatal complications: whether the birth weight is low birth weight (<2500g). | 1=Low weight 0=Not Low weight | mcs1_cm_derived mcs2_cm_derived |
|  | Prenatal depression | APILWM0A APILWM0B APILWM0C APILWM0D APILWM0E | Type of illness/problem during pregency: Depression or mental illness | 1=Prenatal depression 0=Not Prenatal depression | mcs1_parent_interview |
|  | Prenatal eclampsia | APILWM0A APILWM0B APILWM0C APILWM0D APILWM0E | Type of illness/problem during pregency: Raised blood pressure, pre/eclampsia | 1=Prenatal eclampsia 0=Not Prenatal eclampsia | mcs1_parent_interview |
|  | Prenatal epilepsy | APILWM0A APILWM0B APILWM0C APILWM0D APILWM0E | Type of illness/problem during pregency: Neurological problems:epilepsy | 1=Prenatal epilepsy 0=Not Prenatal epilepsy | mcs1_parent_interview |
|  | Prenatal Suspected Slow Growth | APILWM0A APILWM0B APILWM0C APILWM0D APILWM0E | Type of illness/problem during pregency:Suspected slow growth of baby | 1=Suspected Growth Abnormality 0=Not Suspected Growth Abnormality | mcs1_parent_interview |
|  | Multiple pregnancy | APILWM0A APILWM0B APILWM0C APILWM0D APILWM0E | Type of illness/problem during pregency:Pregancy diagnosed as twins, triplets | 1=Twin pregnancy 0=Not Twin pregnancy | mcs1_parent_interview |
|  | Threatened miscarriage | APILWM0A APILWM0B APILWM0C APILWM0D APILWM0E | Type of illness/problem during pregency: threatened miscarriage or Bleeding | 1=Threatened miscarriage 0=Not Threatened miscarriage | mcs1_parent_interview |
|  | Prenatal asthma | APILWM0A APILWM0B APILWM0C APILWM0D APILWM0E | Type of illness/problem during pregency: Asthma, hay fever, eczema etc | 1=Prenatal asthma 0=Not Prenatal asthma | mcs1_parent_interview |
|  | Prenatal persistent vomiting | APILWM0A APILWM0B APILWM0C APILWM0D APILWM0E | Type of illness/problem during pregency:persistent vomiting | 1=Prenatal persistent vomiting 0=Not Prenatal persistent vomiting | mcs1_parent_interview |
|  | Prenatal non-trivial infections | APILWM0A APILWM0B APILWM0C APILWM0D APILWM0E | Type of illness/problem during pregency:Non-trivial infections | 1=Prenatal non-trivial infections 0=Not Prenatal non-trivial infections | mcs1_parent_interview |
|  | Prenatal smoking | APSMTY00 APCIPR00 APSMCH00 | Prenatal smoking was inferred by 4 factors: smoked in last 2 years, Number of cigarettes smoked per day before preg, Changed number smoked during pregnancy, and Number smoked per day after change | 1=Yes 0=No | mcs1_parent_interview |
|  | Prenatal drinking | PDROF00 | Frequency of alcohol consumption during pregnancy | 1=Everyday 2=5-6 times perweek 3=3-4times perweek 4=1-2times perweek 5=1-2times permonth 6=Less than once a month 7=Never | mcs1_parent_interview |
|  | Age group | ADDAGB00 BDDAGB00 | Respondent age at birth of CM (grouped) | 1=12 to 19 2=20 to 29 3=30 to 39 4=40 plus | mcs1_parent_derived mcs2_parent_derived |
|  | Prepregnancy BMI | APHECM00 APWTBF00 APWBST00 APWBLB00 APWBKG00 | Body Mass Index (BMI) was calculated from the mother’s height and weight before pregnancy | Numeric | mcs1_parent_interview |
| Early maternal parenting style | Mother-child Conflicts | BPPIAN00 BPPIAR00 BPPIBD00 BPPIPT00 BPPISM00 BPPIST00 BPPIUC0 | The conflict score in mother-child relationships (from CPRS [1]). | Numeric | mcs2_parent_cm_derived |
|  | Mother-child positive relationship | BPPIAW00 BPPIBP00 BPPICO00 BPPIET00 BPPISE00 BPPISI00 BPPIVA00 | The positive mother-child relationship score in the Pianta scale (from CPRS [1]). | Numeric | mcs2_parent_cm_derived |
|  | Breastfeeding | ACBFEV00 BPBFEA00 | Whether the person was breastfed? | 1=Yes 2=No | mcs1_parent_cm_interview mcs2_parent_cm_interview |
|  | Postpartum depression | APDIFC0A APDIFC0B APDIFC0C APDIFC0D APDIFC0E | Postpartum depression in the first nine months. | 1=Yes 0=No | mcs1_parent_interview |
|  | Regular bedtimes | BPBERE00 | Children has regular bedtimes | 1=Never or almost never 2=Sometimes 3=Usually 4=Always | mcs2_parent_cm_derived |
|  | Regular eat | BPMERE00 | Whether CM eats at regular times | 1=Never or almost never 2=Sometimes 3=Usually 4=Always | mcs2_parent_cm_derived |
|  | Single parent | BPFCIN00 | Classify 'Married, 1st and only marriage' and 'Remarried, 2nd or later marriage' as non-single parent, and classify 'Legally separated,' 'Single never married,' 'Divorced,' and 'Widowed' as single parent. | 1=Yes 0=No | mcs2_parent_interview |
| Child environmental exposure | Media | BPTVHO00 | Hours a day child watches tv/videos | 1=Not at all 2=Up to one hour 3=More than 1 hour,less than 3 hours 4=Or,more than 3hours | mcs2_parent_cm_derived |
|  | Injury | BPACCA00 | Number of accidents or injuries | Numeric | mcs2_parent_cm_derived |
|  | Secondhand smoke | APSMKR00 BPSMKR00 | Whether anyone smokes in the same room as CM | 1=Yes 2=No | mcs1_parent_interview mcs2_parent_interview |
| Early child cognitive and behavioral development | Suspected social delay | ACSMIL00 ACWAVE00 ACNODS00 ACGIVE00 ACARMS00 | Social and communication skills involve the ability to interact with others, assessing whether there are suspicions of delayed social and communication development (from DDST [2]) | 1=Yes 0=No | mcs1_parent_cm_derived |
|  | Suspected fine motor delay | ACHAND00 ACGRAB00 ACPICK00 ACPTOY00 | Fine motor skills refer to the ability to control smaller body parts, checking for suspicions of delayed fine motor development (from DDST [2]) | 1=Yes 0=No | mcs1_parent_cm_derived |
|  | Suspected gross motor delay | ACSITU00 ACSTAN00 ACWALK00 ACMOVE00 | Gross motor skills refer to the ability to control large body parts, assessing whether there are suspicions of delayed motor development (from DDST [2]) | 1=Yes 0=No | mcs1_parent_cm_derived |
|  | Mood | APHAPN00 APUNFA00 APBRUS00 APFEED00 APINJU00 | The Mood assesses the infant’s emotional responses in various situations, particularly the expression of pleasantness and calmness (From CITS [3]) | Numeric | mcs1_parent_cm_derived |
|  | Approach | APBATH00 APWARY00 APBSHY00 | The Approach measures the infant's response to new stimuli or strangers, reflecting their openness or avoidance behavior (From CITS [3]) | Numeric | mcs1_parent_cm_derived |
|  | Adaptability | APFRET00 APSLEE00 APMILK00 | The Adaptability evaluates the infant’s ability to adjust to new situations, environments, or changes, demonstrating their adaptability (From CITS [3]) | Numeric | mcs1_parent_cm_derived |
|  | Regularity | APSLTI00 APNAPS00 APSOFO00 | The Regularity focuses on the consistency of the infant’s daily routines, particularly the stability of feeding, sleeping, and activity patterns (From CITS [3]) | Numeric | mcs1_parent_cm_derived |
|  | Cry | APFUBS00 APFUAS00 APCRYS00 | The Cry measures the frequency and intensity of the infant’s crying when experiencing discomfort or unmet needs (From CITS [3]) | Numeric | mcs1_parent_cm_derived |
|  | Naming vocabulary | BDSRCP00 | Naming vocabulary - percentile (from BAS [4]) | Numeric | mcs2_cm_cognitive_assessment |
|  | School readiness composit | BDBASP00 | School readiness composite percentile (from BBCS-R [5]) | Numeric | mcs2_cm_cognitive_assessment |
|  | Independence-Self Regulation | BDCSBI00 | Independence-Self Regulation assesses an individual's ability to autonomously manage their behavior and emotions in daily life, including self-control, organization, and completing tasks independently (from CSBQ [6-7]) | Numeric | mcs2_cm_derived |
|  | Emotional-Dysregulation | BDCSBE00 | Emotional-Dysregulation assesses the intensity or maladaptiveness of emotional responses, such as extreme mood swings or difficulty controlling emotions in stressful situations (from CSBQ [6-7]) | Numeric | mcs2_cm_derived |
|  | Emotional Symptoms | BEMOTION | Emotional Symptoms assesses emotional distress, such as anxiety, depression, and irritability (from SDQ [8]) | Numeric | mcs2_cm_derived |
|  | Conduct problems | BCONDUCT | Conduct problem measures behavioral issues, such as aggression, defiance, and disruptive behavior (from SDQ [8]) | Numeric | mcs2_cm_derived |
|  | Peer problems | BPEER | Peer problem assesses issues in social interactions, such as isolation, rejection, or difficulty relating to others (from SDQ [8]) | Numeric | mcs2_cm_derived |
|  | Prosocial Behaviour | BPROSOC | Prosocial Behaviour focuses on positive social behaviors, such as helping others, sharing, and cooperation (from SDQ [8]) | Numeric | mcs2_cm_derived |

***Notes***. CM refer to cohort member, CPRS refer to Child-Parent Relationship Scale, DDST refer to Denver Developmental Screening Test, CITS refer to Carey Infant Temperament Scale, BAS refer to The British Ability Scales, BBCS-R refer to The Bracken Basic Concept Scale – Revised, CSBQ refer to Child Social Behaviour Questionnaire, SDQ refer to Strengths and Difficulties Questionnaire.

**Table A2.** Hyperparameters of six machine-learning

| RandomForest | n_estimators ∈{200,400,600,800,1000} max_depth ∈{None,20,40,60,80} max_features ∈{sqrt,log2} min_samples_split ∈{2,8,15,30} min_samples_leaf ∈{1,3,5} bootstrap ∈{True,False} |
| --- | --- |
| SVM | C ∈{0.01,0.1,1,10,100,1e3,1e4,1e5} gamma ∈{scale,auto,1e-4,1e-3,1e-2,0.1,1,10} tol ∈{1e-6,1e-5,1e-4,1e-3} class_weight ∈{ class_weights, 'balanced'} shrinking ∈{True,False} |
| LightGBM | n_estimators ∈{200,600,1000,1400} learning_rate ∈{0.01,0.05,0.1} num_leaves ∈{31,63,127} max_depth ∈{–1,10,20}； subsample ∈{0.6,0.8,1.0} colsample_bytree ∈{0.7,1.0} reg_alpha ∈{0.0,0.1} |
| KNN | n_neighbors ∈{3,7,11,15,19,23,27} weights ∈{uniform,distance} metric ∈{euclidean,manhattan,chebyshev,cosine} leaf_size ∈{20,40,60} algorithm ∈{auto,kd_tree,ball_tree} p ∈{1,2} |
| XGBoost | n_estimators ∈{400,800,1200} learning_rate ∈{0.01,0.1} max_depth ∈{6,10,14} min_child_weight ∈{1,5} subsample,colsample_bytree ∈{0.7,1.0} gamma ∈{0.0,0.1} reg_alpha ∈{0.0,0.1} reg_lambda ∈{1,3} |
| MLP | hidden_layer_sizes ∈{(64,),(128,),(256,),(128,64),(256,128),(256,128,64)} activation ∈{relu,tanh} solver ∈{adam,lbfgs,sgd} alpha ∈{1e-5,1e-4,1e-3} learning_rate_init ∈{1e-4,1e-3,1e-2} batch_size ∈{64,128,256}。 |

**Table A3.** Tuned hyper-parameters for six machine-learning

| **Model** | **Hyper-parameter** | **Value** |
| --- | --- | --- |
| RandomForest | n_estimators | 800 |
|  | min_samples_split | 15 |
|  | min_samples_leaf | 5 |
|  | class_weight | {0:0.514167188478397,1:18.146408839779006} |
|  | n_jobs | 1 |
|  | random_state | 42 |
| SVM | C | 1000 |
|  | gamma | 0.0001 |
|  | tol | 1.00E-06 |
|  | probability | TRUE |
|  | class_weight | balanced |
|  | random_state | 42 |
| LightGBM | learning_rate | 0.01 |
|  | n_estimators | 200 |
|  | subsample | 0.6 |
|  | num_leaves | 63 |
|  | reg_alpha | 0.1 |
|  | class_weight | {0:0.514167188478397, 1:18.146408839779006} |
|  | random_state | 42 |
| KNN | n_neighbors | 15 |
|  | metric | cosine |
|  | p | 1 |
|  | leaf_size | 20 |
| XGBoost | n_estimators | 800 |
|  | learning_rate | 0.1 |
|  | eval_metric | logloss |
|  | scale_pos_weight | 0.028334377 |
|  | random_state | 42 |
| MLP | hidden_layer_sizes | (256, 128, 64) |
|  | activation | tanh |
|  | solver | sgd |
|  | learning_rate_init | 0.01 |
|  | alpha | 0.001 |
|  | batch_size | 64 |

**Table A4.** Pairwise comparison of weighted test-set accuracy between XGBoost and alternative models

| Comparator Model | Weighted Accuracy | Raw p-value | Holm-adjusted p-value |
| --- | --- | --- | --- |
| RandomForest | 0.0208 | 0.4795 | 0.9156 |
| SVM | 0.0172 | 0.4083 | 0.9156 |
| LightGBM | 0.1038 | 0.0031 | 0.0155 |
| KNN | 0.0362 | 0.1666 | 0.6664 |
| MLP | 0.0181 | 0.3052 | 0.9156 |

**Table A5**. Permutation sensitivity analysis of prenatal and postnatal feature groups using 10-fold cross-validation

| Model | Original AUC | ΔAUC pregnancy | ΔAUC Postnatal | ΔAUC Demographic |
| --- | --- | --- | --- | --- |
| XGBoost | 0.8505 | 0.0068 | 0.2352 | 0.0306 |
| SVM | 0.8729 | 0.0254 | 0.18 | 0.0492 |

**Table A6**. Analysis of the linear correlation distribution between the prenatal and postnatal groups across all features

| Count | Mean | Std | Min | 25% | 50% | 75% | Max |
| --- | --- | --- | --- | --- | --- | --- | --- |
| 442 | 0.03 | 0.037 | 0 | 0.007 | 0.018 | 0.037 | 0.341 |

***Notes***. Std refers to Standard Deviation,

**Table A7.** Univariate logistic regression analysis of the effect of Mothers academic qualification on the occurrence of childhood ADHD.

| Variable | Coefficient | SE | OR | LL | UL | z | p-value |
| --- | --- | --- | --- | --- | --- | --- | --- |
| Constant | -4.072 | 0.177 | 0.017 | 0.012 | 0.024 | -23.078 | <0.001 |
| MA | 0.128 | 0.038 | 1.136 | 1.055 | 1.224 | 3.382 | 0.001 |

***Notes***. MA refers to Mothers academic qualification, SE refers to Standard error, OR refers to Odds ratio, LL refers to Lower limit of 95 % confidence interval, UL refers to Upper limit of 95 % confidence interval


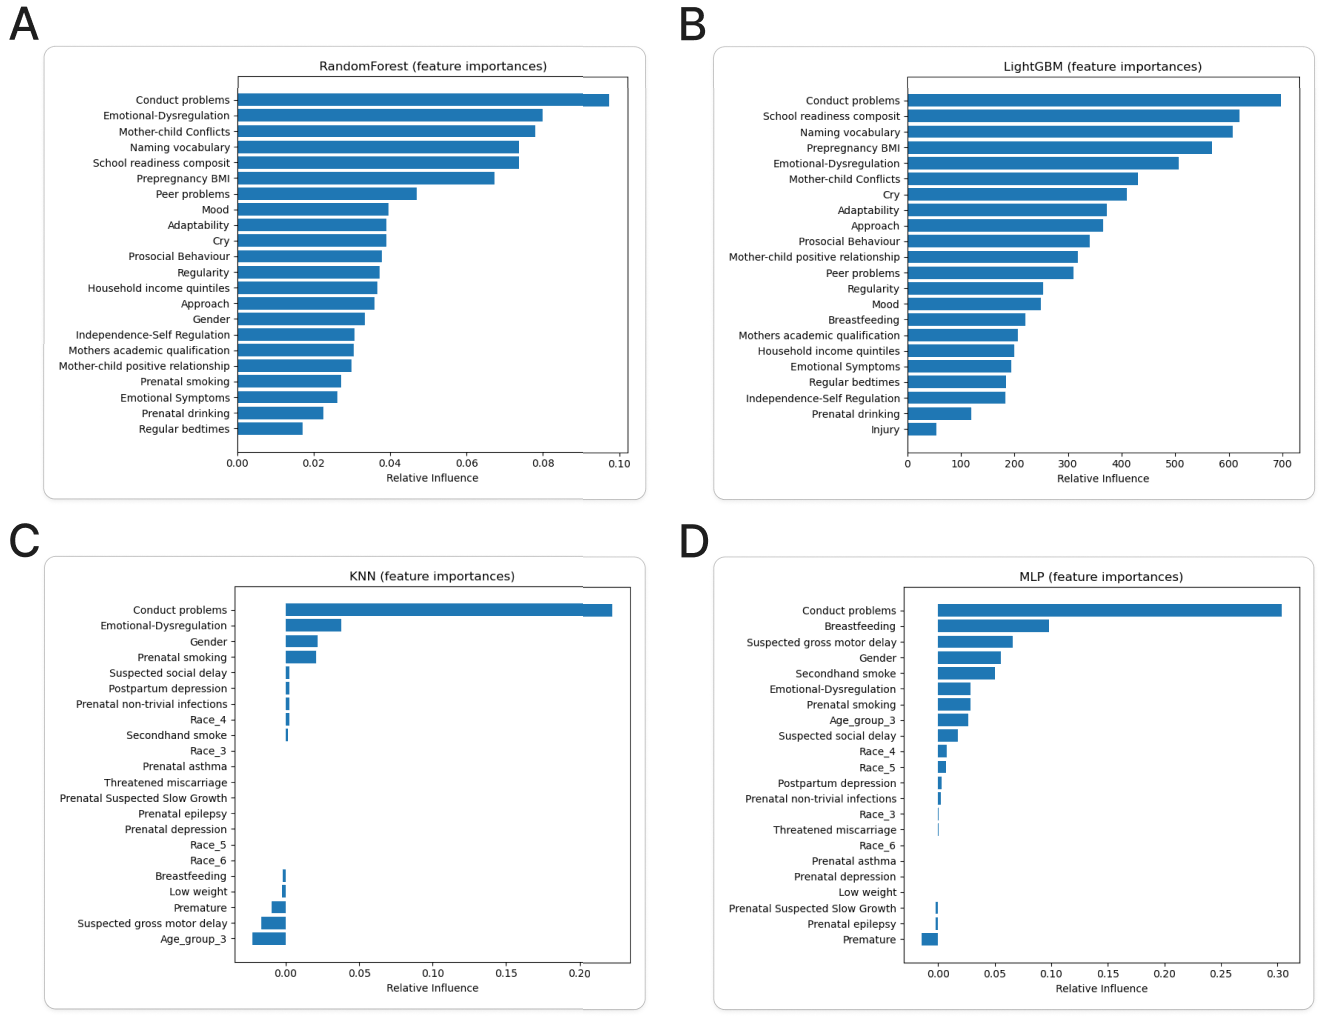


**Fig.A1** **Feature importance of four machine learning algorithm**. (A) Random Forest feature importance, (B) lightGBM feature importance, (C) KNN feature importance, (D) MLP feature importance.


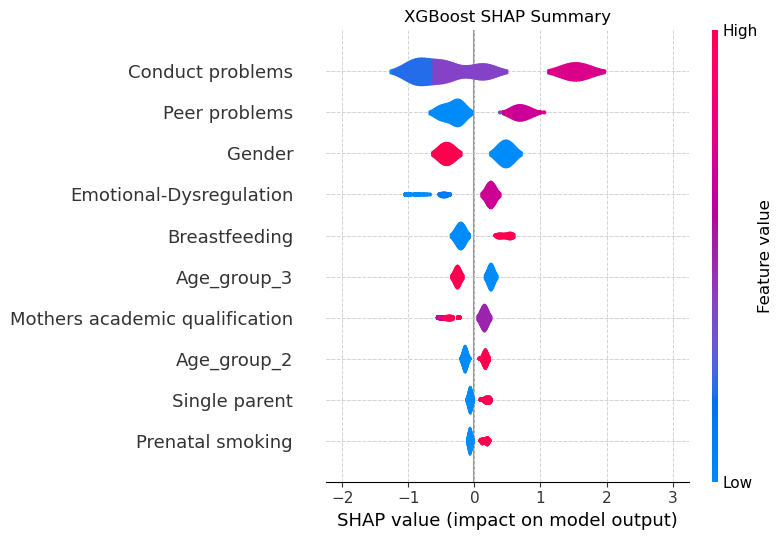
**Fig.A2 Global SHAP summary plot illustrating feature importance in the XGBoost model (Exclude sampling weights)**

**References**

1. Pianta RC (1992) Child–Parent Relationship Scale. University of Virginia.
2. Frankenburg WK, Dodds JB (1967) The Denver Developmental Screening Test. The Journal of Pediatrics 71:181–191. <https://doi.org/10.1016/s0022-3476(67)80070-2>
3. Carey C, McDevitt SC (1997) Infant Temperament Questionnaire. Department of Educational Psychology, Temple University, Philadelphia
4. Elliott CD, Smith P, McCulloch K (1997) British Ability Scales. Technical Manual, London: Nelson
5. Bracken BA (1998) Bracken Basic Concept Scale— Revised. TX: Psychological Corporation, San Antonio
6. Sammons P, Sylva S, Melhuish E, et al (2004) The Effective Provision of Pre-school Education (EPPE) Project: Technical Paper 11: The continuing effect of pre-school education at age 7 years. London: Institute of Education.
7. Melhuish E, Hanna K, Quinn L, et al (2004) The Effective Pre-school Provision in Northern Ireland Project, Technical Paper 11: Pre-school Experience and Social/Behavioural Development at the End of Year 3 of Primary School. Belfast, N.I.: Stranmillis University Press.
8. Goodman R (1997) The Strengths and Difficulties Questionnaire: A Research Note. Journal of Child Psychology and Psychiatry 38:581–586. <https://doi.org/10.1111/j.1469-7610.1997.tb01545.x>
